# Supplementary material for: Outcomes of 4 years of molecular genetic diagnosis on a panel of genes involved in premature aging syndromes, including laminopathies and related disorders
Source: Orphanet J Rare Dis. 2019 Dec 11;14:288. doi: 10.1186/s13023-019-1189-z (PMC6907233; doi:10.1186/s13023-019-1189-z)
Supplement: Supplementary file 1 — Tables S1. Alphabetical list of genes included in the NGS panel “premature ageing syndromes and laminopathies”. AD: automal dominant; AR: autosomal recessive; Mi: mitochondrial; XLR: X linked recessive; XLD: X linked dominant; Smu: somatic mutation; IC: isolated cases. (XLSX 33 kb) [file 13023_2019_1189_MOESM1_ESM.xlsx]

## Sheet: Table S1 
Table S1 : alphabetical list of genes included in the NGS panel "premature ageing syndromes and laminopathies". AD: automal dominant; AR: autosomal recessive; Mi: mitochondrial; XLR: X linked recessive; XLD: X linked dominant; Smu: somatic mutation; IC: isolated cases.
Gene	Location	Complete name of gene	Gene MIM number	Phenotype	Phenotype MIM number	Inheritance
ABCC9	12p12.1	ATP-BINDING CASSETTE, subfamily C, member 9	601439	Atrial fibrillation, familial, 12	614050	AD
				Cardiomyopathy, dilated, 1O	608569	/
				Hypertrichotic osteochondrodysplasia	239850	AD
ACAN	15q26.1	AGGRECAN 1	155760	Spondyloepimetaphyseal dysplasia, aggrecan type	612813	AR
				Spondyloepiphyseal dysplasia, Kimberley type	608361	AD
				Short stature and advanced bone age, with or without early-onset osteoarthritis and/or osteochondritis dissecans	165800	AD
ADIPOQ	3q27.3	ADIPOCYTE-, C1q-, AND COLLAGEN DOMAIN CONTAINING	605441	Adiponectin deficiency	612556	/
AGPAT2	9q34.3	1-ACYLGLYCEROL-3-PHOSPHATE O-ACYLTRANSFERASE 2	603100	Lipodystrophy, congenital generalized, type 1	608594	AR
ALDH18A1	10q24.1	ALDEHYDE DEHYDROGENASE 18 FAMILY, MEMBER A1	138250	Cutis laxa, autosomal dominant 3	616603	AD
				Cutis laxa, autosomal recessive, type IIIA; De Barsy syndrome	219150	AR,IC
				Spastic paraplegia 9A, autosomal dominant	601162	AD
				Spastic paraplegia 9B, autosomal recessive	616586	AR
ANTXR1	2p13.3	ANTHRAX TOXIN RECEPTOR 1	606410	GAPO syndrome	230740	AR
				Hemangioma, capillary infantile, susceptibility to}	602089	AD
ATM	11q22.3	ATAXIA-TELANGECTASIA MUTATED GENE	607585	Ataxia-telangiectasia	208900	AR
				Lymphoma, B-cell non-Hodgkin, somatic	/	/
				Lymphoma, mantle cell, somatic	/	/
				T-cell prolymphocytic leukemia, somatic	/	/
				{Breast cancer, susceptibility to}	114480	SMu, AD
ATP6V0A2	12q24.31	ATPase, H+ TRANSPORTING, LYSOSOMAL, V0 SUBUNIT A2	611716	Cutis laxa, autosomal recessive, type IIA	219200	AR
				Wrinkly skin syndrome	278250	AR
ATP7A	Xq21.1	ATPase, Cu(2+)-TRANSPORTING, ALPHA POLYPEPTIDE	300011	Menkes disease	309400	XLR
				Occipital horn syndrome	304150	XLR
				Spinal muscular atrophy, distal, X-linked 3	300489	XLR
ATR	3q23	ATAXIA-TELANGECTASIA AND RAD3-RELATED	601215	Cutaneous telangiectasia and cancer syndrome, familial	614564	AD
				Seckel syndrome 1	210600	AD
B3GALT6	1p36.33	BETA-1,3-GALACTOSYLTRANSFERASE 6	615291	Ehlers-Danlos syndrome, spondylodysplastic type, 2	615349	AR
				Spondyloepimetaphyseal dysplasia with joint laxity, type 1, with or without fractures	271640	AR
B4GALT7	5q35.3	BETA-1,4-GALACTOSYLTRANSFERASE 7	604327	Ehlers-Danlos syndrome, spondylodysplastic type, 1	130070	AR
BANF1	11q13.1	BARRIER-TO-AUTOINTEGRATION FACTOR 1	603811	Nestor-Guillermo progeria syndrome	614008	AR
BLM	15q26.1	RECQ PROTEIN-LIKE 3	604610	Bloom syndrome	210900	AR
BSCL2	11q12.3	BSCL2 GENE	606158	Encephalopathy, progressive, with or without lipodystrophy	615924	AR
				Lipodystrophy, congenital generalized, type 2	269700	AR
				Neuropathy, distal hereditary motor, type VA	600794	AD
				Silver spastic paraplegia syndrome	270685	AD
CAV1	7q31.2	CAVEOLIN 1	601047	Lipodystrophy, congenital generalized, type 3	612526	/
				Partial lipodystrophy, congenital cataracts, and neurodegeneration syndrome	606721	AD
				Pulmonary hypertension, primary, 3	615343	AD
CAVIN1	17q21.2	CAVEOLAE-ASSOCIATED PROTEIN 1	603198	Lipodystrophy, congenital generalized, type 4	613327	AR
CIDEC	3p25.3	CELL DEATH-INDUCING DFFA-LIKE EFFECTOR C	612120	Lipodystrophy, familial partial, type 5	615238	AR
COL1A1	17q21.33	COLLAGEN TYPE I, ALPHA-1	120150	Caffey disease	114000	AD
				Ehlers-Danlos syndrome, arthrochalasia type, 1	130060	AD
				Osteogenesis imperfecta, type I	166200	AD
				Osteogenesis imperfecta, type II	166210	AD
				Osteogenesis imperfecta, type III	259420	AD
				Osteogenesis imperfecta, type IV	166220	AD
				{Bone mineral density variation QTL, osteoporosis}	166710	AD
COL1A2	7q21.3	COLLAGEN, TYPE I, ALPHA-2	120160	Ehlers-Danlos syndrome, arthrochalasia type, 2	617821	AD
				Ehlers-Danlos syndrome, cardiac valvular type	225320	AR
				Osteogenesis imperfecta, type II	166210	AD
				Osteogenesis imperfecta, type III	259420	AD
				Osteogenesis imperfecta, type IV	166220	AD
				{Osteoporosis, postmenopausal}	166710	AD
COL3A1	2q32.2	COLLAGEN, TYPE III, ALPHA-1	120180	Ehlers-Danlos syndrome, vascular type	130050	AD
COL5A1	9q34.3	COLLAGEN, TYPE V, ALPHA-1	120215	Ehlers-Danlos syndrome, classic type, 1	130000	AD
COL5A2	2q32.2	COLLAGEN, TYPE V, ALPHA-2	120190	Ehlers-Danlos syndrome, classic type, 2	130010	AD
DKC1	Xq28	DYSKERIN	300126	Dyskeratosis congenita, X-linked	305000	XLR
EFEMP2	11q13.1	EGF-CONTAINING FIBULIN-LIKE EXTRACELLULAR MATRIX PROTEIN 2	604633	Cutis laxa, autosomal recessive, type IB	614437	AR
EGFR	7p11.2	EPIDERMAL GROWTH FACTOR RECEPTOR	131550	Inflammatory skin and bowel disease, neonatal, 2	616069	AR
				Adenocarcinoma of lung, response to tyrosine kinase inhibitor in	211980	AR
				Nonsmall cell lung cancer, response to tyrosine kinase inhibitor in	211980	AR
				{Nonsmall cell lung cancer, susceptibility to}	211980	AR
ELN	7q11.23	ELASTIN	130160	Cutis laxa, autosomal dominant	123700	AD
				Supravalvar aortic stenosis	185500	AD
EMD	Xq28	EMERIN	300384	Emery-Dreifuss muscular dystrophy 1, X-linked	310300	XLR
ERCC1	19q13.32	EXCISION REPAIR, COMPLEMENTING DEFECTIVE,IN CHINESE HAMSTER,1	126380	Cerebrooculofacioskeletal syndrome 4	610758	AR
ERCC2	19q13.32	EXCISION REPAIR, COMPLEMENTING DEFECTIVE,IN CHINESE HAMSTER,2	126340	Cerebrooculofacioskeletal syndrome 2	610756	AR
				Trichothiodystrophy 1, photosensitive	601675	AR
				Xeroderma pigmentosum, group D	278730	AR
ERCC3	2q14.3	EXCISION REPAIR, COMPLEMENTING DEFECTIVE,IN CHINESE HAMSTER,2	133510	Trichothiodystrophy 2, photosensitive	616390	AR
				Xeroderma pigmentosum, group B	610651	AR
ERCC4	16p13.12	EXCISION REPAIR, COMPLEMENTING DEFECTIVE, IN CHINESE HAMSTER, 4	133520	XFE progeroid syndrome	610965	AR
				Fanconi anemia, complementation group Q	615272	AR
				Xeroderma pigmentosum, group F	278760	AR
				Xeroderma pigmentosum, type F/Cockayne syndrome	278760	AR
ERCC5	13q33.1	EXCISION REPAIR, COMPLEMENTING DEFECTIVE, IN CHINESE HAMSTER, 5;	133530	Cerebrooculofacioskeletal syndrome 3	616570	AR
				Xeroderma pigmentosum, group G	278780	AR
				Xeroderma pigmentosum, group G/Cockayne syndrome	278780	AR
ERCC6	10q11.23	EXCISION REPAIR CROSS-COMPLEMENTING, GROUP 6	609413	Cerebrooculofacioskeletal syndrome 1	214150	AR
				Cockayne syndrome, type B	133540	AR
				De Sanctis-Cacchione syndrome	278800	AR
				Premature ovarian failure 11	616946	AD
				UV-sensitive syndrome 1	600630	AR
				{Lung cancer, susceptibility to}	211980	AR
				{Macular degeneration, age-related, susceptibility to, 5}	613761	/
ERCC8	5q12.1	EXCISION REPAIR CROSS-COMPLEMENTING, GROUP 8;	609412	Cockayne syndrome, type A	216400	AR
				UV-sensitive syndrome 2	614621	AR
FBLN5	14q32.12	FIBULIN 5	604580	Cutis laxa, autosomal dominant 2	614434	/
				Cutis laxa, autosomal recessive, type IA	219100	AR
				Macular degeneration, age-related, 3	608895	AD
				Neuropathy, hereditary, with or without age-related macular degeneration	608895	AD
FBN1	15q21.1	FIBRILLIN 1	134797	Acromicric dysplasia	102370	AD
				Ectopia lentis, familial	129600	AD
				Geleophysic dysplasia 2	614185	AD
				Marfan lipodystrophy syndrome	616914	AD
				Marfan syndrome	154700	AD
				MASS syndrome	604308	AD
				Stiff skin syndrome	184900	AD
				Weill-Marchesani syndrome 2, dominant	608328	AD
GJA1	6q22.31	GAP JUNCTION PROTEIN, ALPHA-1	121014	Atrioventricular septal defect 3	600309	AD
				Craniometaphyseal dysplasia, autosomal recessive	218400	AR
				Erythrokeratodermia variabilis et progressiva 3	617525	AD
				Hypoplastic left heart syndrome 1	241550	AR
				Oculodentodigital dysplasia	164200	AD
				Oculodentodigital dysplasia, autosomal recessive	257850	AR
				Syndactyly, type III	186100	AD
				Palmoplantar keratoderma with congenital alopecia	104100	AD
GORAB	1q24.2	GOLGIN, RAB6-INTERACTING	607983	Geroderma osteodysplasticum	231070	AR
GTF2H5	6q25.3	GENERAL TRANSCRIPTION FACTOR IIH, POLYPEPTIDE 5	608780	Trichothiodystrophy 3, photosensitive	616395	/
IFT122	3q21.3-q22.1	INTRAFLAGELLAR TRANSPORT 122, CHLAMYDOMONAS, HOMOLOGUE OF	606045	Cranioectodermal dysplasia 1	218330	AR
IFT43	14q24.3	INTRAFLAGELLAR TRANSPORT 43, CHLAMYDOMONAS, HOMOLOG OF	614068	Cranioectodermal dysplasia 3	614099	AR
				Retinitis pigmentosa 81	617871	AR
				Short-rib thoracic dysplasia 18 with polydactyly	617866	/
KCNJ6	21q22.13	POTASSIUM CHANNEL, INWARDLY RECTIFYING, SUBFAMILY J, MEMBER 6	600877	Keppen-Lubinsky syndrome	614098	AD
LBR	1q42.12	LAMIN B RECEPTOR	600024	Reynolds syndrome	613471	AD
				Greenberg skeletal dysplasia	215140	AR
				Pelger-Huet anomaly	169400	AD
				Pelger-Huet anomaly with mild skeletal anomalies	618019
LEMD3	12q14.3	LEM DOMAIN-CONTAINING PROTEIN 3	607844	Buschke-Ollendorff syndrome	166700	AD
				Osteopoikilosis with or without melorheostosis	166700	AD
LIPE	19q13.2	LIPASE, HORMONE-SENSITIVE	151750	Lipodystrophy, familial partial, type 6	615980	AR
LMNA	1q22	LAMIN A/C	150330	Cardiomyopathy, dilated, 1A	115200	AD
				Charcot-Marie-Tooth disease, type 2B1	605588	AR
				Emery-Dreifuss muscular dystrophy 2, autosomal dominant	181350	AD
				Emery-Dreifuss muscular dystrophy 3, autosomal recessive	616516	AR
				Heart-hand syndrome, Slovenian type	610140	AD
				Hutchinson-Gilford progeria	176670	AR, AD
				Lipodystrophy, familial partial, type 2	151660	AD
				Malouf syndrome	212112	AD
				Mandibuloacral dysplasia	248370	AR
				Muscular dystrophy, congenital	613205	AD
				Restrictive dermopathy, lethal	275210	AR
LMNB1	5q23.2	LAMIN B1	150340	Leukodystrophy, adult-onset, autosomal dominant	169500	AD
LMNB2	19p13.3	LAMIN B2	150341	Epilepsy, progressive myoclonic, 9	616540	AR
				{Lipodystrophy, partial, acquired, susceptibility to}	608709	AD
LTBP4	19q13.2	LATENT TRANSFORMING GROWTH FACTOR-BETA-BINDING PROTEIN 4	604710	Cutis laxa, autosomal recessive, type IC	613177	AR
MAGEL2	15q11.2	MAGE-LIKE 2	605283	Schaaf-Yang syndrome	615547	AD
MGP	12p12.3	MATRIX GAMMA-CARBOXYGLUTAMIC ACID	154870	Keutel syndrome	245150	/
MPLKIP	7p14.1	M-PHASE-SPECIFIC PLK1-INTERACTING PROTEIN	609188	Trichothiodystrophy 4, nonphotosensitive	234050	AR
NAA10	Xq28	N-ALPHA-ACETYLTRANSFERASE 10, NatA CATALYTIC SUBUNIT	300013	Microphthalmia, syndromic 1	309800	XL
				Ogden syndrome	300855	XLD, XLR
PCNA	20p12.3	PROLIFERATING CELL NUCLEAR ANTIGEN	176740	Ataxia-telangiectasia-like disorder 2	615919	AR
PDGFRB	5q32	PLATELET-DERIVED GROWTH FACTOR RECEPTOR, BETA	173410	Basal ganglia calcification, idiopathic, 4	615007	AD
				Kosaki overgrowth syndrome	616592	AD
				Myeloproliferative disorder with eosinophilia	131440	AD
				Myofibromatosis, infantile, 1	228550	AD
				Premature aging syndrome, Penttinen type	601812	AD
PIK3R1	5q13.1	PHOSPHATIDYLINOSITOL 3-KINASE, REGULATORY SUBUNIT 1	171833	Agammaglobulinemia 7, autosomal recessive	615214	AR
				Immunodeficiency 36	616005	AD
				SHORT syndrome	269880	AD
PLIN1	15q26.1	PERILIPIN 1	170290	Lipodystrophy, familial partial, type 4	613877	AD
POLD1	19q13.33	POLYMERASE (DNA-DIRECTED), DELTA 1, CATALYTIC SUBUNIT	174761	Mandibular hypoplasia, deafness, progeroid features, and lipodystrophy syndrome	615381	AD
				{Colorectal cancer, susceptibility to, 10}	612591	AD
PPARG	3p25.2	PEROXISOME PROLIFERATOR-ACTIVATED RECEPTOR-GAMMA	601487	Carotid intimal medial thickness 1	609338	/
				Insulin resistance, severe, digenic	604367	AD
				Lipodystrophy, familial partial, type 3	604367	AD
				Obesity, severe	601665	AR, AD, Mi
				[Obesity, resistance to]
				{Diabetes, type 2}	125853	AD
PRDM5	4q27	PR DOMAIN-CONTAINING PROTEIN 5	614161	Brittle cornea syndrome 2	614170	AR
PSMB8	6p21.32	PROTEASOME SUBUNIT, BETA-TYPE, 8	177046	Proteasome-associated autoinflammatory syndrome 1 and digenic forms	256040	AR
PTDSS1	8q22.1	PHOSPHATIDYLSERINE SYNTHASE 1	612792	Lenz-Majewski hyperostotic dwarfism	151050	AD
PYCR1	17q25.3	PYRROLINE-5-CARBOXYLATE REDUCTASE 1	179035	Cutis laxa autosomal recessive type IIB	612940	AR
				Cutis laxa, autosomal recessive, type IIIB; De Barsy syndrome	614438	/
RECQL4	8q24.3	DNA HELICASE, RECQ-LIKE, TYPE 4; RECQ4	603780	Baller-Gerold syndrome	218600	AR
				RAPADILINO syndrome	266280	AR
				Rothmund-Thomson syndrome	268400	AR
RIN2	20p11.23	RAS AND RAB INTERACTOR 2; RIN2	610222	Macrocephaly, alopecia, cutis laxa, and scoliosis	613075	AR
SH3PXD2B	5q35.1	SH3 AND PX DOMAINS-CONTAINING PROTEIN 2B; SH3PXD2B	613293	Frank-ter Haar syndrome	249420	AR
SLC39A13	11p11.2	SOLUTE CARRIER FAMILY 39 (ZINC TRANSPORTER), MEMBER 13; SLC39A13	608735	Ehlers-Danlos syndrome, spondylodysplastic type, 3	612350	AR
SPRTN	1q42.2	SprT-LIKE N-TERMINAL DOMAIN PROTEIN; SPRTN	616086	Ruijs-Aalfs syndrome	616200	AR
SYNE1	6q25.2	SPECTRIN REPEAT-CONTAINING NUCLEAR ENVELOPE PROTEIN 1;SYNE1	608441	Emery-Dreifuss muscular dystrophy 4, autosomal dominant	612998	AD
				Spinocerebellar ataxia, autosomal recessive 8	610743	AR
SYNE2	14q23.2	SPECTRIN REPEAT-CONTAINING NUCLEAR ENVELOPE PROTEIN 2;SYNE2	608442	Emery-Dreifuss muscular dystrophy 5, autosomal dominant	612999	AD
TALDO1	11p15.5	TRANSALDOLASE 1; TALDO1	602063	Transaldolase deficiency	606003	AR
TFAP2A	6p24.3	TRANSCRIPTION FACTOR AP2-ALPHA;	107580	Branchiooculofacial syndrome	113620	AD
TMEM43	3p25.1	TRANSMEMBRANE PROTEIN 43;TMEM43	612048	Arrhythmogenic right ventricular dysplasia 5	604400	AD
				Emery-Dreifuss muscular dystrophy 7, AD	614302	AD
TMPO	12q23.1	THYMOPOIETIN; TMPO	188380	formerly CARDIOMYOPATHY, DILATED, 1T	recently RECLASSIFIED	/
TNXB	6p21.33-p21.32	TENASCIN XB; TNXB	600985	Ehlers-Danlos syndrome, classic-like, 1	606408	AR
				Vesicoureteral reflux 8	615963	AD
WDR19	4p14	WD REPEAT-CONTAINING PROTEIN 19;WDR19	608151	Cranioectodermal dysplasia 4	614378	AR
				Short-rib thoracic dysplasia 5 with or without polydactyly	614376	AR
				Nephronophthisis 13	614377	AR
				Senior-Loken syndrome 8	616307	AR
WDR35	4p14	WD REPEAT-CONTAINING PROTEIN 35;WDR35	613602	Cranioectodermal dysplasia 2	613610	AR
				Short-rib thoracic dysplasia 7 with or without polydactyly	614091	AR
WRN	8p12	RECQ PROTEIN-LIKE 2; RECQL2	604611	Werner syndrome	277700	AR
XPA	9q22.33	XPA GENE; XPA	611153	Xeroderma pigmentosum, group A	278700	AR
ZMPSTE24	1p34.2	ZINC METALLOPROTEINASE STE24;ZMPSTE24	606480	Mandibuloacral dysplasia with type B lipodystrophy	608612	AR
				Restrictive dermopathy, lethal	275210	AR
ZNF469	16q24.2	ZINC FINGER PROTEIN 469; ZNF469	612078	Brittle cornea syndrome 1	229200	AR
